# Supplementary material for: Variations in dietary patterns in the ancient Greek colony of Abdera: insights from isotopic evidence and bayesian modeling
Source: Research Square preprint supplement (doi:10.21203/rs.3.rs-5368831/v1), 2024-11-20
Supplement: Supplementary file 1 [file 619b2451c9bdc86b232837ec.xlsx]

## Sheet: ToC
Variations in dietary patterns in the ancient Greek colony of Abdera: insights from isotopic evidence and bayesian modeling
Zisis Anastasios¹, Georgiadou Angeliki¹, Ganiatsou Elissavet¹, Panagiota Xanthopoulou¹, Kallintzi Konstantina², Papageorgopoulou Christina¹
(1) Laboratory of Physical Anthropology, Department of History and Ethnology, Democritus University of Thrace
(2) Ephorate of Antiquities of Xanthi, Archaeological Museum at Abdera, Ministry of Culture and Sports
Table of Contents
Table S1. Summary of the dataset including archaeological information (archaeological sector, grave number and sector number), and anthropological information (sample ID, sex and age-at-death estimation), stable isotope results and collagen quality indicators (C%, N%, C:N). Chronological assignment was based on https://www.culture.gov.gr/anaskafes/pdfs/TIMELINE.pdf: Archaic era: 610-490/80 BC, Cl…
Table S2. Faunal dataset included in this study
Table S3. Isotope measurements and collagen quality indicators (C%, N%, S%, C:N, S:N, C:N) for 71 Abdera individuals
Table S4. Detailed calculations for analytical uncertenties (Ubias, Rw and Uc) for carbon
Table S5. Detailed calculations for analytical uncertenties (Ubias, Rw and Uc) for nitrogen
Table S6. Detailed calculations for analytical uncertenties (Ubias, Rw and Uc) for sulphur
Table S7. The results from the Kolmogorov-Smirnoff tests of δ15N and δ13C values of the Abdera population (n=71) among chronological periods. (Archaic: 655-490/80, Classical: 490/80-323 BC, Hellenistic: 323-31 BC, Roman: 31 BC-324 AD).
Table S8. The results from the Kolmogorov-Smirnoff tests of δ15N and δ13C values of the Abdera population (n=71) among sexes.
Table S9. MixSIAR model estimates of C3 and C4 plants, fish and animal protein of the population of ancient Abdera (654 BC-400 AD) obtained from MixSIAR combining carbon and nitrogen stable isotope ratios of bone collagen.

## Sheet: S1. Abdera population
Table S1. Summary of the dataset including archaeological information (archaeological sector, grave number and sector number), and anthropological information (sample ID, sex and age-at-death estimation), stable isotope results and collagen quality indicators (C%, N%, C:N). Chronological assignment was based on https://www.culture.gov.gr/anaskafes/pdfs/TIMELINE.pdf: Archaic era: 610-490/80 BC, Cl…
Sample_ID	Chronology	Chronology label	Sex	Age	Archaeological Information
ABD 10	late 6th-early 5th c BC	Archaic	Female	Middle Adult	Chortolivado Agroktima Velonhs/59/97.06
ABD 119	late 6th-early 5th c BC	Archaic	Female	Middle Adult	Chortolivado/ Notios Dromos Anadasmou/ Agroktima Velonis/ Burial 33
ABD 103	650-570 BC	Archaic	Female	Infant2	Ammolofos, Koum Tepe/208
ABD 51	650-570 BC	Archaic	Female	Middle Adult	Ammolofos, Koum Tepe/206
ABD 111	late 7th c BC-early 6th c BC	Archaic	Female	Infant2	Ammolofos, Koum Tepe/207
ABD 113	late 7th c BC	Archaic	Female	Infant2	Ammolofos, Koum Tepe/201
ABD 7	late 6th-early 5th c BC	Archaic	Female	Young Adult	Chortolivado/ Agroktima Velonis/27/97.06
ABD 73	late 6th-early 5th c BC	Archaic	Female	Old Adult	Chortolivado Agroktima Velonis/46
ABD 75	late 6th-early 5th c BC	Archaic	Female	Middle Adult	Chortolivado Agroktima Velonhs/67/97.06
ABD 91	late 6th-early 5th c BC	Archaic	Female	Young Adult	Chortolivado Agroktima Velonis/5/97.08
ABD 93	650-570 BC	Archaic	Female	Infant2	Ammolofos, Koum Tepe/212
ABD 13	late 6th-early 5th c BC	Archaic	Male	Adult	Agios Athanasios/clay sarcofaghus/2002.1
ABD 136	late 6th-early 5th c BC	Archaic	Male	Old Adult	Chortolivado/1/97.25
ABD 2	late 6th-early 5th c BC	Archaic	Male	Middle Adult	Chortolivado Agroktima Velonhs/56/97.06
ABD 28	late 6th-early 5th c BC	Archaic	Male	Infant2	Chortolivado Agroktima Velonis/4/97.06
ABD 5	late 7th-early 6th c BC	Archaic	Male	Middle Adult	Chortolivado Agroktima Velonhs/59/97.08/ 10
ABD 59	late 6th-early 5th c BC	Archaic	Male	Middle Adult	Chortolivado Agroktima Velonis/1/97.22
ABD 87	late 6th-early 5th c BC	Archaic	Male	Middle Adult	Chortolivado Agroktima Velonhs/38/97.06
ABD 9	late 6th-early 5th c BC	Archaic	Male	Young Adult	Chortolivado Agroktima Velonis/47/97.06
ABD 84	late 6th-early 5th c BC	Archaic	Male	Infant2	Chortolivado Agroktima Velonhs/3/97.08
ABD 98	late 6th-early 5th c BC	Archaic	Male	Infant2	Chortolivado Agros Vambakidi/burial jar 3
ABD 100	650-570 BC	Archaic	Undetetemined	Subadult	Ammolofos, Koum Tepe/217
ABD 104	650-570 BC	Archaic	Undetetemined	Infant2	Ammolofos, Koum Tepe/224
ABD 109	650-570 BC	Archaic	Undetetemined	Subadult	Ammolofos, Koum Tepe/241
ABD 112	650-570 BC	Archaic	Undetetemined	Infant2	Ammolofos, Koum Tepe/245
ABD 16	late 6th-early 5th c BC	Archaic	Undetetemined	Subadult	Chortolivado/ Agroktima Velonhs/east of the stream/97.06
ABD 20	late 7th c BC	Archaic	Undetetemined	Infant1	Ammolofos, Koum Tepe/280
ABD 21	late 6th-early 5th c BC	Archaic	Undetetemined	Subadult	Chortolivado/ Dromos Anadasmou/ Agroktima Veloni/ 69.06/ Burial east
ABD 22	late 6th-early 5th c BC	Archaic	Undetetemined	Infant1	Chortolivado Agroktima Velonis/4/97.22
ABD 26	late 6th-early 5th c BC	Archaic	Undetetemined	Infant2	Chortolivado Agroktima Velonis/tomb A’/97.06
ABD 27	late 6th-early 5th c BC	Archaic	Undetetemined	Subadult	Chortolivado Agroktima Velonis/14
ABD 33	late 6th-early 5th c BC	Archaic	Undetetemined	Subadult	Chortolivado/ Dromos Anadasmou/ Agroktima Veloni/ 97.08/ 11/ Ind 2
ABD 41	late 6th-early 5th c BC	Archaic	Undetetemined	Infant2	Chortolivado/ Dromos Anadasmou/ Agroktima Veloni/ 97.24/6
ABD 102	650-570 BC	Archaic	Undetetemined	Adult	Ammolofos, Koum Tepe/242
ABD 106	650-570 BC	Archaic	Undetetemined	Adult	Ammolofos, Koum Tepe/209
ABD 131	late 6th-early 5th c BC	Archaic	Undetetemined	Middle Adult	Chortolivado/ Agr. Dermentzoglou/porous sarcofagus/96.3
ABD 137	650-570 BC	Archaic	Undetetemined	Adult	Ammolofos, Koum Tepe/196
ABD 139	650-570 BC	Archaic	Undetetemined	Adult	Ammolofos, Koum Tepe/195
ABD 57	late 6th-early 5th c BC	Archaic	Undetetemined	Young Adult	Chortolivado Agroktima Velonis/54/97.06
ABD 94	650-570 BC	Archaic	Undetetemined	Infant2	Ammolofos, Koum Tepe/243
ABD 95	650-570 BC	Archaic	Undetetemined	Infant1	Ammolofos, Koum Tepe/234
ABD 105	late 4th-early 3rd BC	Classical	Female	Middle Adult	Almiri Limni/ marble sarcofagus
ABD 107	late 4th BC	Classical	Female	Young Adult	Almiri Limni/ Agros Asimidi/ 95.17/ Cist grave
ABD 11	late 4th c BC	Classical	Female	Middle Adult	Toumpa 7/ jar 2/
ABD 122	5th c BC	Classical	Male	Young Adult	Chortolivado/Agroktima Velonhs/1/97.08
ABD 31	late 4th-early 3rd c BC	Classical	Male	Middle Adult	Chortolivado Agroktima Abderon/ Agros Stagoni/ 1
ABD 78	5th-3rd c BC	Classical	Male	Young Adult	Strogili Limni/ Agros Piskilopoulou Toumba 1
ABD 88	late 4th-early 3rd c BC	Classical	Male	Adult	Paliochora, Agros Vamvakidi/2/95.18
ABD 121	late 6th-early 3rd c BC	Classical	Undetetemined	Subadult	Lofos Tsakalion/ Agros Imamidh/97.05/2
ABD 141	early 5th -early 3rd c BC	Classical	Undetetemined	Subadult	Almiri Limni/AgrosVardaki/clay sarcofagus
ABD 32	4th c BC	Classical	Undetetemined	Subadult	Psila Vourla/ Agros Bourazan/ 97.33/ Burial 4/ Ind 2
ABD 54	4th c BC	Classical	Undetetemined	Subadult	Psila Vourla/ Agros Bourazan/ 97.33/ Burial 4/ Ind 1
ABD 63	late 4th c BC	Classical	Undetetemined	Young Adult	Paliochora/2007.07/ Burial 2
ABD 66	late 4th c BC	Classical	Undetetemined	Subadult	Paliochora/ Agr. Katsika/sarcofagus
ABD 68	late 4th-early 3rd c BC	Classical	Undetetemined	Subadult	Chortolivado Agroktima Abderon/ Agros Stagoni/ 2
ABD 92	early 5th c BC	Classical	Undetetemined	Subadult	Elos Pelargon/ Agrotikos Dromos/ 98.03
ABD 99	late 4th c BC	Classical	Undetetemined	Adult	Paliochora/ Agros Anadasmou/ 98.19
ABD 108	late 3rd-2nd c BC	Hellenistic	Female	Middle Adult	Agros Chatzopoulou/41
ABD 123	2nd c BC	Hellenistic	Female	Middle Adult	Valta Zampaki, Agros Chatzopoulou/48
ABD 138	late 3rd-2nd c BC	Hellenistic	Female	Middle Adult	Valta Zampaki, Archaic wall/14
ABD 17	late 3rd-2nd c BC	Hellenistic	Female	Young Adult	Valta Zampaki, Agros Chatzopoulou/37
ABD 30	late 3rd-2nd c BC	Hellenistic	Female	Middle Adult	Valta Zampakh, Archaic Wall/26/Ind.1
ABD 71	2nd c BC	Hellenistic	Female	Juvenile	Valta Zampaki, Agros Chatzopoulou/49
ABD 81	late 3rd-2nd c BC	Hellenistic	Female	Middle Adult	Valta Zampaki, Archaic wall/15
ABD 83	late 3rd-2nd c BC	Hellenistic	Female	Young Adult	Valta Zampaki, Archaic wall/25
ABD 127	late 3rd-2nd c BC	Hellenistic	Male	Middle Adult	Valta Zampaki, Agr. Chatzopoulou/34
ABD 128	late 3rd-2nd c BC	Hellenistic	Male	Middle Adult	Valta Zampaki, Agros Chatzopoulou/35
ABD 129	2nd c BC	Hellenistic	Male	Middle Adult	Valta Zampaki, Agros Chatzopoulou/31
ABD 132	late 3rd-2nd c BC	Hellenistic	Male	Young Adult	Valta Zampakh, Archaic Wall/11
ABD 133	300 BC	Hellenistic	Male	Adult	Lofos Tsakalion/Toumpa 7/ Burial 6
ABD 134	late 3rd-2nd c BC	Hellenistic	Male	Old Adult	Valta Zampaki, Agros Chatzopoulou/40
ABD 140	2nd c BC	Hellenistic	Male	Middle Adult	Valta Zampaki, Agros Chatzopoulou/47
ABD 72	late 3rd-2nd c BC	Hellenistic	Male	Infant2	Valta Zampaki, Agros Chatzopoulou/32/
ABD 76	late 3rd-2nd c BC	Hellenistic	Male	Young Adult	Valta Zampakh, Archaic Wall/12
ABD 79	2nd c BC	Hellenistic	Male	Adult	Valta Zampaki, Agros Chatzopoulou/50
ABD 1	300 BC	Hellenistic	Undetetemined	Subadult	Lofos Tsakalion/ Burial 1
ABD 114	late 3rd-2nd c BC	Hellenistic	Undetetemined	Infant2	Valta Zampaki, Agros Chatzopoulou/42
ABD 115	late 3rd-2nd c BC	Hellenistic	Undetetemined	Infant1	Valta Zampaki, Agros Chatzopoulou/33
ABD 125	300 BC	Hellenistic	Undetetemined	Subadult	Mirodato, Mpairitsa/cist grave
ABD 126	2nd c BC	Hellenistic	Undetetemined	Subadult	Valta Zampaki, Agros Chatzopoulou/46
ABD 130	late 3rd-2nd c BC	Hellenistic	Undetetemined	Subadult	Valta Zampaki, Archaic wall/chamber tomb
ABD 135	late 3rd-2nd c BC	Hellenistic	Undetetemined	Subadult	Valta Zampaki, Agros Chatzopoulou/43
ABD 25	late 3rd-2nd c BC	Hellenistic	Undetetemined	Infant1	Valta Zampakh, Archaic wall/9
ABD 3	300 BC	Hellenistic	Undetetemined	Adult	Lofos Tsakalion/Toumpa 7/Burial 3
ABD 34	late 3rd-2nd c BC	Hellenistic	Undetetemined	Subadult	Valta Zampaki, Archaic wall/32
ABD 64	late 3rd-2nd c BC	Hellenistic	Undetetemined	Infant2	Valta Zampaki, Archaic wall/Section1/2
ABD 69	late 3rd-2nd c BC	Hellenistic	Undetetemined	Subadult	Valta Zampaki, Archaic wall/19
ABD 70	2nd c BC	Hellenistic	Undetetemined	Subadult	Valta Zampaki, Archaic wall/47
ABD 80	late 3rd-2nd c BC	Hellenistic	Undetetemined	Subadult	Valta Zampakh, Archaic Wall/26/Ind.3
ABD 82	late 3rd-2nd c BC	Hellenistic	Undetetemined	Subadult	Valta Zampaki, Archaic wall/13
ABD 18	Imperial Roman	Roman	Female	Infant2	Region of West Gate/19/D'
ABD 19	Imperial Roman	Roman	Female	Infant2	Sector E'/9/E'
ABD 35	Imperial Roman	Roman	Female	Middle Adult	Sector E’/17/E’
ABD 55	Imperial Roman	Roman	Female	Infant2	Region of West Gate/26/D'
ABD 61	Imperial Roman	Roman	Female	Juvenile	Region of West Gate/20/D'
ABD 67	Imperial Roman	Roman	Female	Young Adult	Region of West Gate/12/D'
ABD 90	Imperial Roman	Roman	Female	Young Adult	Sector E'/3/E'
ABD 116	Imperial Roman	Roman	Male	Middle Adult	Sector E'/6/E'
ABD 117	Imperial Roman	Roman	Male	Adult	Region of West Gate/8/D'
ABD 120	Imperial Roman	Roman	Male	Middle Adult	Region of West Gate/9/D'
ABD 96	Imperial Roman	Roman	Male	Infant2	Region of West Gate/6/D'
ABD 45	Imperial Roman	Roman	Undetetemined	Infant1	Sector E'/13/E'
ABD 46	Imperial Roman	Roman	Undetetemined	Infant2	Sector E'/13
ABD 49	Imperial Roman	Roman	Undetetemined	Infant1	Region of West Gate/14
ABD 50	Imperial Roman	Roman	Undetetemined	Subadult	Sector E'/11
ABD 52	Imperial Roman	Roman	Undetetemined	Infant1	Sector E'/7/E'
ABD 53	Imperial Roman	Roman	Undetetemined	Middle Adult	Sector E'/7/E'
ABD 56	Imperial Roman	Roman	Undetetemined	Infant1	Sector E'/8/E'
ABD 60	Imperial Roman	Roman	Undetetemined	Infant2	Sector E'/10/E'
		Chronological period	Males	Females	Undet.	Total
		Archaic	10	11	20	41
		Classical	3	4	9	16
		Hellenistic	10	8	15	33
		Roman	4	7	8	19
		Total	27	30	52	109

## Sheet: S2. Fauna dataset
Table S2. Faunal dataset included in this study
Sample_ID	Species	Collagen yield (%)	δ¹⁵N ratios	δ¹³C ratios	Nitrogen Content (%)	Carbon Content (%)	C:N	Sulphur Content	Sulphur Content	d34SV-CDT	C:S	C:N
ABD 36	donkey	0.0318	6.5	-19.2	12.6	38.22	2.9	14.6721	0.216403	7.78699	471.483	133.284
ABD 37	horse	0.1203	6.8	-20	14.52	39.55	3.11	8.85809	0.232496	8.31911	454.119	142.963
ABD 65	horse	0	*
ABD 47	animal	0	*

## Sheet: S3. Human  dataset
Table S3. Isotope measurements and collagen quality indicators (C%, N%, S%, C:N, S:N, C:N) for 71 Abdera individuals
Sample_ID	Chronology	Sex	Age	Collagen yield (%)	δ¹⁵N ratios	δ¹³C ratios	δ34S ratios	Nitrogen Content (%)	Carbon Content (%)	C:N	Sulphur Content	C:S	C:N
ABD 102	Archaic	Undetetemined	Adult	0.0537	8.51	-20.4	18.3757	8.29	23.18	3.26	0.17	364.001	111.629
ABD 84	Archaic	Male	Infant2	0.0232	8.71	-20.26	8.19404	7.86	21.67	3.22	0.15	385.661	119.951
ABD 93	Archaic	Female	Infant2	0.1068	9.1	-20.08	11.5182	15.19	42.15	3.24	0.333595	337.3	104.234
ABD 112	Archaic	Undetetemined	Infant2	0.044	9.57	-20		9.44	25.8	3.19
ABD 87	Archaic	Male	Middle Adult	0.0487	8.28	-19.92	8.73658	13.56	35.95	3.09	0.202314	474.363	153.428
ABD 137	Archaic	Undetetemined	Adult	0.0506	9.07	-19.83	8.46	15.85	42.69	3.14	0.416822	253.364	77.0512
ABD 61	Roman	Female	Juvenile	0.0692	9.48	-19.74		6.6	18.1	3.2
ABD 79	Hellenistic	Male	Adult	0.0447	14.82	-19.74	9.34767	14.13	37.67	3.11	0.2	502.81	161.728
ABD 67	Roman	Female	Young Adult	0.0451	8.83	-19.71	8.38544	13.37	34.92	3.05	0.226904	410.838	134.885
ABD 111	Archaic	Female	Infant2	0.1348	9.28	-19.69		17	47	3.12
ABD 141	Classical	Undetetemined	Sunadult	0.0415	11.07	-19.43		15	41.2	3.2
ABD 78	Classical	Male	Young Adult	0.02	7.48	-19.43	12.7894	10.99	29.3	3.11	0.2	391.09	125.788
ABD 115	Hellenistic	Undetetemined	Infant1	0.0568	9.21	-19.4	5.45452	13.55	36.59	3.15	0.219257	445.501	141.468
ABD 76	Hellenistic	Male	Young Adult	0.047	9.41	-19.36	9.0895	11.31	31.4	3.24	0.184092	455.337	140.637
ABD 57	Archaic	Undetetemined	Young Adult	0.0371	9.15	-19.35		12.8	39.9	3.2
ABD 132	Hellenistic	Male	Young Adult	0.0361	8.35	-19.33		11.64	32.92	3.3
ABD 100	Archaic	Undetetemined	Sunadult	0.0682	10.85	-19.27	8.32	7.69	21.84	3.31	0.734689	84.2264	25.8299
ABD 135	Hellenistic	Undetetemined	Sunadult	0.0337	8.42	-19.24	8.57999	13.95	37.98	3.18	0.16	633.685	199.584
ABD 11	Classical	Female	Middle Adult	0.0546	11.52	-19.21	9.10019	15.76	42.72	3.16	0.189676	601.254	190.203
ABD 136	Archaic	Male	Old Adult	0.0757	9.97	-19.21	8.28026	13.23	36.24	3.2	0.259792	372.393	116.575
ABD 20	Archaic	Undetetemined	Infant1	0.0471	9.89	-19.09		7.21	19.58	3.17
ABD 96	Roman	Male	Infant2	0.0424	9.62	-19.09	5.65507	14.03	39.56	3.29	0.3	352.025	107.056
ABD 106	Archaic	Undetetemined	Adult	0.0357	8.76	-19.08	9.51147	6.71	19.43	3.38	0.15	345.796	102.401
ABD 18	Roman	Female	Infant2	0.0557	10.82	-19.07		10.26	27.89	3.17
ABD 75	Archaic	Female	Middle Adult	0.0776	8.84	-19.06	-2.40253	12.72	35.19	3.23	0.20901	449.46	139.314
ABD 120	Roman	Male	Middle Adult	0.0268	9.37	-19.04	7.43351	6.64	18.55	3.26	0.15	330.135	101.333
ABD 113	Archaic	Female	Infant2	0.0376	10.56	-18.99		9.35	25.98	3.24
ABD 80	Hellenistic	Undetetemined	Sunadult	0.0327	10.82	-18.97	8.5174	14.61	41.23	3.29	0.21217	518.762	157.63
ABD 109	Archaic	Undetetemined	Sunadult	0.0946	11.04	-18.89	9.24	14.25	37.98	3.11	0.439982	177.775	57.1788
ABD 123	Hellenistic	Female	Middle Adult	0.0955	9.67	-18.7	8.48929	15.15	40.49	3.12	0.231258	467.402	149.965
ABD 98	Archaic	Male	Infant2	0.0184	9.5	-18.7		14.13	37.67	3.11
ABD 114	Hellenistic	Undetetemined	Infant2	0.091	10.05	-18.67	7.77096	14.49	40.3	3.25	0.268712	400.365	123.439
ABD 117	Roman	Male	Adult	0.014	8.52	-18.63		10.42	29.26	3.28
ABD 95	Archaic	Undetetemined	Infant1	0.0546	10.48	-18.63	2.17383	10.9	29.01	3.11	0.213309	363.059	116.974
ABD 31	Classical	Male	Middle Adult	0	10.07	-18.59	Insufficient sulphur content to permit isotope analysis.*	15.8	41.85	3.22
ABD 90	Roman	Female	Young Adult	0.0755	10.86	-18.59	10.2046	14	37.16	3.1	0.198131	500.681	161.751
ABD 51	Archaic	Female	Middle Adult	0.0114	9.08	-18.57	7.73707	7.86	21.85	3.24	0.15	388.865	119.951
ABD 128	Hellenistic	Male	Middle Adult	0.0471	9.64	-18.56	8.306	14.23	40.3	3.3	0.219745	489.58	148.237
ABD 17	Hellenistic	Female	Young Adult	0.0486	10.85	-18.54	7.06302	14.85	40.99	3.22	0.281317	388.974	120.838
ABD 53	Roman	Undetetemined	Middle Adult	0.0659	11.65	-18.51	7.76988	13.96	37.92	3.17	0.243296	416.076	131.348
ABD 140	Hellenistic	Male	Middle Adult	0.0827	10.85	-18.4		15.82	43	3.17
ABD 92	Classical	Undetetemined	Sunadult	0.1373	9.24	-18.37	4.98576	14.88	41.69	3.27	0.246364	451.744	138.26
ABD 122	Classical	Male	Young Adult	0.0919	11.45	-18.35	10.0314	16.01	43.07	3.14	0.190962	602.096	191.918
ABD 121	Classical	Undetetemined	Sunadult	0.083	10.02	-18.33		14.41	38.46	3.11
ABD 60	Roman	Undetetemined	Infant2	0.1316	10.33	-18.28	16.423	14.56	39.9	3.2	0.323989	328.761	102.873
ABD 7	Archaic	Female	Young Adult	0.042	8.82	-18.19		16.58	40.25	3.13
ABD 103	Archaic	Female	Infant2	0.095	10.92	-18.17	8.69317	6.15	17.71	3.36	0.25	315.185	93.8548
ABD 134	Hellenistic	Male	Old Adult	0.1423	10.21	-18.15	8.56978	16.48	44.52	3.15	0.238891	497.5	157.917
ABD 71	Hellenistic	Female	Juvenile	0.0708	9.82	-18.11	Insufficient sulphur content to permit isotope analysis.*	14.92	38.93	3.04
ABD 19	Roman	Female	Infant2	0.0796	10.5	-18.04	7.77468	14.42	39.68	3.21	0.21747	487.091	151.788
ABD 88	Classical	Male	Adult	0.0515	10.86	-18.03		10.71	29.59	3.23
ABD 131	Archaic	Undetetemined	Middle Adult	0.0312	8.46	-17.95		2.93	8.65	3.44
ABD 63	Classical	Undetetemined	Young Adult	0.105	10.98	-17.9	7.53525	15.35	42.32	3.22	0.208917	540.767	168.193
ABD 72	Hellenistic	Male	Infant2	0.0535	10.28	-17.89	8.22128	12.27	32.49	3.09	0.23	377.103	122.121
ABD 13	Archaic	Male	Adult	0.1146	11.43	-17.88	9.02607	14.65	40.06	3.19	0.195249	547.723	171.76
ABD 25	Hellenistic	Undetetemined	Infant1	0.0331	9.88	-17.87	7.91873	11.05	30.08	3.18	0.222385	361.086	113.744
ABD 55	Roman	Female	Infant2	0.0658	13.29	-17.76	3.92747	9.88	28.05	3.31	0.21	356.576	107.699
ABD 10	Archaic	Female	Middle Adult	0.0347	11.04	-17.75	12.5105	13.35	37.16	3.25	0.203263	488.04	150.347
ABD 49	Roman	Undetetemined	Infant1	0.0705	11.69	-17.72	11.069	11.46	32.08	3.27	0.25	342.557	104.934
ABD 30	Hellenistic	Female	Middle Adult	0.0151	10.79	-17.71	7.78699	14.26	39.97	3.27	0.216403	493.071	150.844
ABD 16	Archaic	Undetetemined	Sunadult	0.1083	11.08	-17.67	6.30144	13.71	36.11	3.08	0.255723	376.96	122.727
ABD 46	Roman	Undetetemined	Infant2	0.0431	10.24	-17.26	8.38544	13.82	39.41	3.33	0.226904	463.664	139.424
ABD 129	Hellenistic	Male	Middle Adult	0.1015	9.71	-17.1	7.84	17	45.68	3.12	0.448131	222.14	70.7486
ABD 45	Roman	Undetetemined	Infant1	0.058	13.19	-17.01	5.23179	14.06	39.52	3.28	0.244182	432.058	131.809
ABD 116	Roman	Male	Middle Adult	0.0308	11.69	-16.92		14.2	38.95	3.2
ABD 52	Roman	Undetetemined	Infant1	0.0657	13.23	-16.82	6.1851	13.92	39.5	3.31	0.211761	497.954	150.475
ABD 2	Archaic	Male	Middle Adult	0.1021	8.97	-16.46	9.37704	16.62	44.75	3.14	0.21773	548.673	174.737
ABD 56	Roman	Undetetemined	Infant1	0.0488	12.82	-16.32	4.85281	15.19	42.01	3.23	0.20679	542.326	168.151
ABD 83	Hellenistic	Female	Young Adult	0.0515	9.69	-16.31		14.47	38.65	3.12
ABD 94	Archaic	Undetetemined	Infant2	0.0378	8.88	-15.8	7.85704	7	18	3.35	0.15	320.346	106.827
ABD 119	Archaic	Female	Middle Adult	0.0481	9.72	-15.06	7.82499	13.85	37.29	3.14	0.3	331.825	105.682

## Sheet: S4. Calibration for carbon
Table S4. Detailed calculations for analytical uncertenties (Ubias, Rw and Uc) for carbon
Appendix G. Standard uncertainty calculator				Calibration Standards				Check Standards				Sample Replicates
Name:				USGS 40	USGS 41a			IAEA-CH-6	IAEA-CH-7	USGS 43		ABD 10	ABD 13	ABD 15	ABD 19	ABD 34	ABD 45	ABD 46	ABD 48	ABD 52	ABD 56	ABD 58	ABD 60a	ABD 63	ABD 80	ABD 93	ABD 94	ABD 100	ABD 104	ABD 106	ABD 113	ABD 114	ABD 117	ABD 120	ABD 128
Analytical Session				1	1			1	1	1		1	1	1	1	1	1	1	1	1	1	1	1	1	1	1	1	1	1	1	1	1	1	1	1
Known delta:				-26.39	36.55			-10.45	-32.15	-21.28
Standard deviation:				0.04	0.08			0.03	0.05	0.1
Measured mean:				-26.3899	36.5499			-10.4501	-32.1404	-21.2585		-17.7461	-17.8783	-18.561	-18.0446	-19.3457	-17.0128	-17.2587	-17.7194	-16.8181	-16.323	-16.9494	-18.2776	-17.9024	-18.9672	-20.0846	-15.7962	-19.2719	-18.1689	-19.0751	-18.9852	-18.6748	-18.6325	-19.0427	-18.56
Measured StDev:				0.0522795	0.0494022			0.0507116	0.0574095	0.0629743		0.0352183	0.0709825	0.0225943	0.0673234	0.0646375	0.0544737	0.135704	0.073958	0.113613	0.0477956	0.0438444	0.0176622	0.0320381	0.0656957	0.0342986	0.039803	0.0701106	0.0285593	0.089016	0.0344221	0.0891611	0.122594	0.146008	0.100599
Number measured:				27	27			9	9	9		3	3	3	3	3	3	3	3	3	3	3	3	3	3	3	3	3	3	3	3	3	3	3	3
ΔMeasured−Known								-9.5059e-05	0.00963076	0.0215016
ssrm	0.0529627			0.0710619	0.0634551			0.0205734	0.0263668	0.0317261		0.00248066	0.010077	0.00102101	0.00906489	0.008356	0.00593477	0.0368311	0.0109396	0.025816	0.00456883	0.00384466	0.000623906	0.00205288	0.00863185	0.00235278	0.00316855	0.009831	0.00163127	0.0158477	0.00236976	0.0158994	0.0300585	0.0426368	0.0202403
dfsrm		76
srep	0.075592
dfrep		48		0.0134
u(Rw)	0.0752471
RMSbias	0.0136024
u(Cref)	0.0668331
u(bias)	0.0682033
Standard Uncertainty (uc)	0.101557
1				-26.3918	36.4492			-10.5246	-32.1631	-21.2151		-17.7109	-17.8074	-18.5385	-17.9773	-19.2811	-16.9584	-17.123	-17.6454	-16.7045	-16.2752	-16.9056	-18.2599	-17.8704	-18.9015	-20.0503	-15.7564	-19.2018	-18.1403	-18.9861	-18.9508	-18.5856	-18.5099	-18.8967	-18.4594
2				-26.3196	36.5462			-10.4581	-32.205	-21.2673		-17.7813	-17.9493	-18.5836	-18.1119	-19.4104	-17.0673	-17.3944	-17.7933	-16.9317	-16.3708	-16.9932	-18.2952	-17.9345	-19.0329	-20.1189	-15.836	-19.342	-18.1975	-19.1641	-19.0197	-18.7639	-18.7551	-19.1887	-18.6606
3				-26.4581	36.6541			-10.4236	-32.1382	-21.3235		-17.7461	-17.8783	-18.561	-18.0446	-19.3457	-17.0128	-17.2587	-17.7194	-16.8181	-16.323	-16.9494	-18.2776	-17.9024	-18.9672	-20.0846	-15.7962	-19.2719	-18.1689	-19.0751	-18.9852	-18.6748	-18.6325	-19.0427	-18.56
4				-26.3706	36.5159			-10.4169	-32.1008	-21.3058
5				-26.3327	36.5765			-10.4128	-32.1383	-21.1997
6				-26.4665	36.5574			-10.5049	-32.2312	-21.3586
7				-26.3416	36.5384			-10.4807	-32.0895	-21.1756
8				-26.4247	36.5762			-10.3631	-32.0449	-21.2744
9				-26.4036	36.5353			-10.4661	-32.1524	-21.2064
10				-26.3367	36.5181
11				-26.4009	36.5487
12				-26.4323	36.583
13				-26.4189	36.572
14				-26.3614	36.5883
15				-26.3896	36.4896
16				-26.4221	36.5963
17				-26.3086	36.5097
18				-26.4391	36.5438
19				-26.3242	36.5049
20				-26.3966	36.5616
21				-26.449	36.5834
22				-26.4357	36.5865
23				-26.4439	36.4887
24				-26.2901	36.5745
25				-26.4143	36.4373
26				-26.3142	36.6078
27				-26.441	36.6045
28
29
30
31
32
33
34
35
36
37
38
39
40
41
42
43
44
45
46
47
48
49
50
51
52
53
54
55
56
57
58
59
60
61
62
63
64
65
66
67
68
69
70
71
72
73
74
75
76
77
78
79
80
81
82
83
84
85
86
87
88
89
90
91
92
93
94
95
96
97
98
99
100
101
102
103
104
105
106
107
108
109
110
111
112
113
114
115
116
117
118
119
120
121
122
123
124
125
126
127
128
129
130
131
132
133
134
135
136
137
138
139
140
141
142
143
144
145
146
147
148
149
150
151
152
153
154
155
156
157
158
159
160
161
162
163
164
165
166
167
168
169
170
171
172
173
174
175
176
177
178
179
180
181
182
183
184
185
186
187
188
189
190
191
192
193
194
195
196
197
198
199
200

## Sheet: S5. Calibration for nitrogen
Table S5. Detailed calculations for analytical uncertenties (Ubias, Rw and Uc) for nitrogen
Appendix G, Standard uncertainty calculator				Calibration Standards				Check Standards				Sample Replicates
Name:				USGS 40	USGS 41a			IAEA-N-1	IAEA-N-2	USGS 43		ABD 10	ABD 13	ABD 15	ABD 19	ABD 34	ABD 45	ABD 46	ABD 48	ABD 52	ABD 56	ABD 58	ABD 60a	ABD 63	ABD 80	ABD 93	ABD 94	ABD 100	ABD 104	ABD 106	ABD 113	ABD 114	ABD 117	ABD 120	ABD 128
Analytical Session:				1	1			1	1	1		1	1	1	1	1	1	1	1	1	1	1	1	1	1	1	1	1	1	1	1	1	1	1	1
Known delta:				-4.52	47.55			0.4	20.3	8.44
Standard deviation:				0.06	0.15			0.2	0.2	0.1
Measured mean:				-4.51992	47.5499			0.50632	20.4273	8.42831		11.0359	11.4336	10.7119	10.4999	9.15342	13.1916	10.2433	11.693	13.2335	12.8171	11.3585	10.3268	10.9843	10.8182	9.10177	8.87601	10.8548	10.9189	8.76182	10.5607	10.0498	8.5247	9.37249	9.64128
Measured StDev:				0.038367	0.0523248			0.059706	0.0607824	0.033703		0.0472446	0.0472447	0.0290299	0.00359351	0.017719	0.0278368	0.0402022	0.0507759	0.0723142	0.11429	0.0383966	0.0553065	0.0524215	0.0711086	0.0678032	0.219816	0.0246368	0.279622	0.0916127	0.0470373	0.0258345	0.0386077	0.0923288	0.0284528
Number measured:				27	27			9	9	9		3	3	3	3	3	3	3	3	3	3	3	3	3	3	3	3	3	3	3	3	3	3	3	3
ΔMeasured−Known								0.10632	0.127264	-0.0116947
ssrm	0.0372464			0.0382726				0.0285185	0.029556	0.00908714		0.0044641	0.00446413	0.00168547	2.58266e-05	0.000627923	0.00154978	0.00323243	0.00515639	0.0104587	0.0261243	0.0029486	0.00611761	0.00549603	0.0101129	0.00919455	0.0966386	0.00121394	0.156377	0.0167858	0.00442501	0.00133484	0.00298111	0.0170492	0.00161913
dfsrm		76
srep	0.0901484
dfrep		48
u(Rw)	0.0738286
RMSbias	0.0959806
u(Cref)	0.173205
u(bias)	0.198021
Standard Uncertainty (uc)	0.211336
1				-4.5193	47.5452			0.540676	20.4646	8.42817		11.0832	11.4808	10.7409	10.5035	9.17114	13.2194	10.2835	11.7438	13.3059	12.9314	11.3969	10.3821	11.0368	10.8893	9.16957	9.09583	10.8794	11.1986	8.85343	10.6077	10.0756	8.56331	9.46482	9.66973
2				-4.54361	47.5719			0.412801	20.5063	8.39114		10.9887	11.3864	10.6828	10.4963	9.1357	13.1638	10.2031	11.6422	13.1612	12.7029	11.3201	10.2715	10.9319	10.7471	9.03397	8.6562	10.8302	10.6393	8.6702	10.5137	10.0239	8.48609	9.28016	9.61282
3				-4.49705	47.5328			0.528919	20.439	8.42038		11.0359	11.4336	10.7119	10.4999	9.15342	13.1916	10.2433	11.693	13.2335	12.8171	11.3585	10.3268	10.9843	10.8182	9.10177	8.87601	10.8548	10.9189	8.76182	10.5607	10.0498	8.5247	9.37249	9.64128
4				-4.53234	47.5903			0.474679	20.4514	8.44484
5				-4.48454	47.514			0.421918	20.3188	8.44675
6				-4.54302	47.5456			0.494544	20.4254	8.38249
7				-4.47934	47.6071			0.553903	20.4901	8.44916
8				-4.57042	47.5743			0.583866	20.3748	8.48993
9				-4.50996	47.4683			0.54557	20.375	8.40189
10				-4.59274	47.4286
11				-4.47358	47.5849
12				-4.49307	47.6359
13				-4.51272	47.5304
14				-4.49761	47.6105
15				-4.54953	47.509
16				-4.46455	47.5212
17				-4.56097	47.6219
18				-4.53423	47.5066
19				-4.5578	47.5516
20				-4.43573	47.525
21				-4.56624	47.5732
22				-4.49374	47.5114
23				-4.5574	47.5146
24				-4.50866	47.6238
25				-4.47152	47.6338
26				-4.54465	47.5133
27				-4.54356	47.5027
28
29
30
31
32
33
34
35
36
37
38
39
40
41
42
43
44
45
46
47
48
49
50
51
52
53
54
55
56
57
58
59
60
61
62
63
64
65
66
67
68
69
70
71
72
73
74
75
76
77
78
79
80
81
82
83
84
85
86
87
88
89
90
91
92
93
94
95
96
97
98
99
100
101
102
103
104
105
106
107
108
109
110
111
112
113
114
115
116
117
118
119
120
121
122
123
124
125
126
127
128
129
130
131
132
133
134
135
136
137
138
139
140
141
142
143
144
145
146
147
148
149
150
151
152
153
154
155
156
157
158
159
160
161
162
163
164
165
166
167
168
169
170
171
172
173
174
175
176
177
178
179
180
181
182
183
184
185
186
187
188
189
190
191
192
193
194
195
196
197
198
199
200

## Sheet: S6. Calibration for sulphur
Table S6. Detailed calculations for analytical uncertenties (Ubias, Rw and Uc) for sulphur
Appendix G, Standard uncertainty calculator				Calibration Standards				Check Standards				Sample Replicates
Name:				IA-R061				IAEA-SO-5	IA-R068	IA-R069		ADB29	ADB61	ADB90	ADB140	ADB114	ADB13	ADB100	ADB88	ADB15	ADB60a	ADB56	ADB75
Analytical Session:				1				1	1	1		1	1	1	1	1	1
Known delta:				20.33				0.5	5.25	18.91
Standard deviation:				0.13				0.2	0.27	0.22
Measured mean:				20.3218				0.339612	5.18491	18.8995		7.58131	9.38413	6.20516	7.68499	9.57672	9.56808	18.5789	7.45965	8.72526	9.01469	8.176	7.4179
Measured StDev:				0.0862566				0.153835	0.100756	0.0957272		0.359081	0.0515732	0.0283686	0.211764	0.265022	0.270182	0.287367	0.392328	0.0160097	0.105788	0.397327	0.0220771
Number measured:				56				30	28	28		2	2	2	2	2	2
ΔMeasured−Known								-0.160388	-0.0650864	-0.0105308
ssrm	0.108248			0.409211				0.686294	0.274097	0.24742		0.128939	0.00265979	0.000804776	0.0448438	0.0702366	0.0729983	0.0825797	0.153921	0.000256312	0.0111911	0.157869	0.000487397
dfsrm		138
srep	0.348039
dfrep		6
u(Rw)	0.268855
RMSbias	0.100119
u(Cref)	0.231876
u(bias)	0.252568
Standard Uncertainty (uc)	0.368882
1				20.4314				0.259338	5.28572	18.941		7.83522	9.34767	6.1851	7.53525	9.38932	9.37704	18.3757	7.73707	8.73658	9.0895	8.45695	7.43351
2				20.2514				0.207369	5.24637	18.8413		7.3274	9.4206	6.22522	7.83473	9.76412	9.75913	18.7821	7.18223	8.71394	8.93989	7.89504	7.40229
3				20.4615				0.50271	5.32485	18.7523
4				20.2895				0.478449	5.28493	18.8255
5				20.233				0.527021	5.0421	18.9321
6				20.0658				0.483331	5.07671	18.9313
7				20.2004				0.252909	5.21433	18.8258
8				20.3043				0.223118	5.34034	19.128
9				20.3299				0.226413	4.97947	18.9979
10				20.3606				0.214867	5.26324	18.9847
11				20.3533				0.158469	5.07058	18.9979
12				20.3578				0.315811	5.24787	18.9847
13				20.3854				0.285	5.29184	18.867
14				20.3675				0.285763	5.29816	18.7944
15				20.4608				0.205523	5.13165	19.0561
16				20.4452				0.135576	5.08717	18.8575
17				20.2832				0.10184	5.18312	18.8913
18				20.2406				0.284574	5.08744	18.773
19				20.2461				0.234289	5.12153	18.7042
20				20.2079				0.301134	5.15551	18.7908
21				20.2775				0.615029	5.17091	18.9271
22				20.3875				0.472445	5.06381	18.9135
23				20.286				0.534332	5.10847	18.9861
24				20.3618				0.45065	5.34691	18.8794
25				20.2317				0.505286	5.16293	18.932
26				20.4486				0.227953	5.15746	18.9218
27				20.2476				0.137366	5.2753	18.9265
28				20.1991				0.621408	5.15888	18.822
29				20.4313				0.503065
30				20.2744				0.437317
31				20.3853
32				20.4182
33				20.363
34				20.428
35				20.2754
36				20.3313
37				20.3371
38				20.441
39				20.3884
40				20.2524
41				20.3679
42				20.4021
43				20.4098
44				20.383
45				20.2234
46				20.3939
47				20.2545
48				20.4167
49				20.3068
50				20.2465
51				20.2878
52				20.2695
53				20.1656
54				20.3365
55				20.2432
56				20.2725
57
58
59
60
61
62
63
64
65
66
67
68
69
70
71
72
73
74
75
76
77
78
79
80
81
82
83
84
85
86
87
88
89
90
91
92
93
94
95
96
97
98
99
100
101
102
103
104
105
106
107
108
109
110
111
112
113
114
115
116
117
118
119
120
121
122
123
124
125
126
127
128
129
130
131
132
133
134
135
136
137
138
139
140
141
142
143
144
145
146
147
148
149
150
151
152
153
154
155
156
157
158
159
160
161
162
163
164
165
166
167
168
169
170
171
172
173
174
175
176
177
178
179
180
181
182
183
184
185
186
187
188
189
190
191
192
193
194
195
196
197
198
199
200

## Sheet: S7. KS Chronology
Table S7. The results from the Kolmogorov-Smirnoff tests of δ15N and δ13C values of the Abdera population (n=71) among chronological periods. (Archaic: 655-490/80, Classical: 490/80-323 BC, Hellenistic: 323-31 BC, Roman: 31 BC-324 AD).
Chronological periods	δ15N		δ13C
	D	p-value	D	p-value
Archaic-Classical	0.39367	0.2	0.49321	0.05
Archaic-Hellenistic	0.40486	0.15	0.45344	0.06
Archaic-Roman	0.33846	0.32	0.49615	0.04
Classical-Hellenistic	0.41796	0.08	0.18266	0.92
Classical-Roman	0.3333	0.37	0.25294	0.6
Hellenistic-Roman	0.24737	0.59	0.19211	0.86

## Sheet: S8. KS Sex
Table S8. The results from the Kolmogorov-Smirnoff tests of δ15N and δ13C values of the female, male and undetermined individuals from Abdera (n=45).
Sex	δ15N		δ13C
	D	p-value	D	p-value
Female-Male	0.22	0.8	0.19	0.91
Female -Undetermined	0.26	0.62	0.35	0.32
Male - Undetermined	0.18	0.87	0.21	0.78

## Sheet: MixSIAR_Abdera
Table S9. MixSIAR model estimates of C3 and C4 plants, fish and animal protein of the population of ancient Abdera (654 BC-400 AD) obtained from MixSIAR combining carbon and nitrogen stable isotope ratios of bone collagen.
		Mean	SD	0.025	0.05	0.25	0.5	0.75	0.95	0.975
All population	Chronology SD	11.11	4.48	2.76	3.65	7.66	11.32	14.49	18.39	19.17
	Animal protein	0.2	0.18	0	0	0.05	0.15	0.29	0.57	0.66
	C3 Plants	0.31	0.19	0.04	0.06	0.15	0.28	0.45	0.67	0.72
	C4 Plants	0.17	0.17	0	0	0.03	0.12	0.25	0.51	0.6
	Fish	0.33	0.21	0.02	0.03	0.16	0.3	0.46	0.72	0.79
Archaic	Animal protein	0.05	0.18	0	0	0	0	0	0.34	0.87
	C3 Plants	0.38	0.44	0	0	0	0.04	0.97	1	1
	C4 Plants	0.04	0.18	0	0	0	0	0	0.28	0.91
	Fish	0.53	0.45	0	0	0	0.66	1	1	1
Classical	Animal protein	0.01	0.07	0	0	0	0	0	0.05	0.12
	C3 Plants	0.37	0.39	0	0	0.01	0.2	0.74	1	1
	C4 Plants	0.03	0.13	0	0	0	0	0	0.12	0.44
	Fish	0.59	0.39	0	0	0.18	0.73	0.97	1	1
Hellenistic	Animal protein	0	0	0	0	0	0	0	0	0.01
	C3 Plants	0.55	0.37	0	0.01	0.18	0.61	0.93	1	1
	C4 Plants	0	0.01	0	0	0	0	0	0	0.01
	Fish	0.45	0.37	0	0	0.07	0.39	0.82	0.99	1
Roman	Animal protein	0.01	0.08	0	0	0	0	0	0	0.01
	C3 Plants	0.59	0.45	0	0	0.01	0.86	1	1	1
	C4 Plants	0.04	0.17	0	0	0	0	0	0.29	0.75
	Fish	0.36	0.43	0	0	0	0.07	0.91	1	1
